# Supplementary material for: The CUL3-KLHL18 ligase regulates mitotic entry and ubiquitylates Aurora-A
Source: PubMed Central journal article supplement — Biol Open. 2011 Nov 3;1(2):82–91. doi: 10.1242/bio.2011018 (PMC3507203; doi:10.1242/bio.2011018), 2011-11-03
Supplement: supp_bio.2011018_bio-01-02-082-TableS1.pdf [file supp_bio.2011018_bio-01-02-082-TableS1.pdf]

**Table S1. List of CUL3 interacting partners in *Xenopus* egg extract, identified by mass spectrometry.** 174 proteins were identified of which 127 listed here were identified only in CUL3 IP samples and not in control pre-immune IP samples. Known interacting partners of CUL3 are highlighted in yellow, and novel CUL3 interacting BTB proteins are highlighted in blue.

| Protein/Gene Name                                                                                          | Uniprot Entry No. |
|------------------------------------------------------------------------------------------------------------|-------------------|
| XCaspase-6                                                                                                 | Q9IB66            |
| Keratin type 1                                                                                             | CAA28497          |
| <b>CUL3</b>                                                                                                | <b>Q6DE95</b>     |
| Gfpt: glutamine-fructose-6-phosphate transaminase 1                                                        | Q6NTL6            |
| MGC8174: ATP-binding cassette, sub-family F (GCN20), member 1                                              | Q66J73            |
| Paics-prov protein                                                                                         | Q8AVT1            |
| CaMKII: Calcium/calmodulin-dependent protein kinase II gamma M subunit                                     | Q9DFZ8            |
| MGC82844                                                                                                   | Q6GNF2            |
| Keratin                                                                                                    | KRXL              |
| Psme2: proteasome (prosome, macropain) activator subunit 2 (PA28 beta)                                     | Q6GLW2            |
| rpl12: ribosomal protein L12                                                                               | Q8AVW0            |
| tuba1a: tubulin                                                                                            | Q6NRV3            |
| p4hb:prolyl 4-hydroxylase                                                                                  | Q6DD55            |
| Psme1:proteasome (prosome, macropain) activator subunit 1 (PA28 alpha)                                     | Q640X8            |
| smarcc1: SWI/SNF related, matrix associated, actin dependent regulator of chromatin, subfamily c, member 1 | Q7ZY22            |
| MGC80754                                                                                                   | Q6GP09            |
| Rps18:ribosomal protein S18                                                                                | Q6NTT2            |
| Rpsa:40S ribosomal protein SA                                                                              | Q3ZM03            |
| MGC68562                                                                                                   | Q6P699            |
| Rplp1: ribosomal protein, large, P1                                                                        | Q6IMN2            |
| Putative uncharacterized protein                                                                           | Q6DJJ6            |
| Eif3a:eukaryotic translation initiation factor 3, subunit A                                                | Q6PF66            |
| ribosomal protein S14                                                                                      | R4HY14            |
| Camk2d: Calcium/calmodulin-dependent protein kinase type II delta chain                                    | Q9DG02            |
| Rps17:ribosomal protein S17                                                                                | Q6GNF4            |
| Snrpd2: small nuclear ribonucleoprotein D2 polypeptide 16.5kDa                                             | Q5SHZQ7           |
| MGC80314                                                                                                   | Q6GQ64            |
| ccar1:Cell division cycle and apoptosis regulator protein 1                                                | AAH82374          |
| Rpl31:ribosomal protein L31                                                                                | Q6DEN9            |
| <b>Ubb:ubiquitin B</b>                                                                                     | <b>Q7ZXG5</b>     |
| ino1-a:Inositol-3-phosphate synthase 1-A                                                                   | Q7ZXY0            |
| ribosomal protein S3a                                                                                      | R3XL3A            |
| LOC443632                                                                                                  | Q4QR56            |
| rps19:ribosomal protein S19                                                                                | Q6PHL6            |
| Rpl7:ribosomal protein L7                                                                                  | Q3B8I3            |
| Tuba1a: tubulin                                                                                            | Q7ZYU9            |
| Lsf: transcription factor lsf                                                                              | Q7T0B5            |
| ribosomal protein S13                                                                                      | RS13              |
| MGC83164                                                                                                   | Q6IRP2            |
| Hist1h2aa:histone cluster 1, H2aa                                                                          | Q6DKE3            |
| <b>Katna1: Katanin p60 ATPase-containing subunit</b>                                                       | <b>AAD53310</b>   |
| rpl19: 60S ribosomal protein L19                                                                           | AAH41546          |
| isynal-b:Inositol-3-phosphate synthase 1-B                                                                 | Q6DDT1            |
| pcm-1: Pericentriolar material 1 protein                                                                   | Q9PVV4            |
| Rps13: ribosomal protein S3                                                                                | Q7SZT6            |
| polr2c:polymerase (RNA) II (DNA directed) polypeptide C, 33kDa                                             | Q6IRR3            |
| MGC82844                                                                                                   | Q6GQC6            |
| parn-A: Poly(A)-specific ribonuclease PARN                                                                 | AAK64218          |
| eif31:Eukaryotic translation initiation factor 3 subunit L                                                 | Q8AVJ0            |
| Rpl24:ribosomal protein L24                                                                                | Q66L23            |
| Sip1                                                                                                       | Q6DDI7            |
| rpl23a                                                                                                     | Q66KX3            |
| polr2j: polymerase (RNA) II (DNA directed) polypeptide J, 13.3kDa                                          | Q5M778            |
| <b>KLHL18:kelch-like 18</b>                                                                                | <b>Q6DDT3</b>     |
| tpp2: tripeptidyl peptidase II                                                                             | Q6GQZ3            |
| rpl27a: ribosomal protein L27a                                                                             | Q7SZB2            |
| <b>CSN8: COP9 signalosome complex subunit 8</b>                                                            | <b>CSN8</b>       |
| rps26: ribosomal protein S26                                                                               | Q6AZL7            |
| MGC131019                                                                                                  | Q3KQ39            |
| rpl13a: ribosomal protein L13a                                                                             | Q7ZY48            |
| rps2: ribosomal protein S2                                                                                 | Q7TOR9            |
| Rps12:40S ribosomal protein S12                                                                            | Q6PH94            |
| MGC82136                                                                                                   | Q6DJJ7            |
| smarcc4:SWI/SNF related, matrix associated, actin dependent regulator of chromatin, subfamily a, member 4  | Q4VQ79            |
| eif3k: Eukaryotic translation initiation factor 3 subunit K                                                | Q6GNI4            |
| rpl27:60S ribosomal protein L27                                                                            | Q6PHL5            |
| Fau: Finkel-Biskis-Reilly murine sarcoma virus (FBR-MuSV) ubiquitously expressed                           | Q4KLF0            |
| rpl6:60S ribosomal protein L6                                                                              | Q6DJF7            |

**Table 1S. Continued.**

| Protein/Gene Name                                                 | Uniprot Entry No. |
|-------------------------------------------------------------------|-------------------|
| <b>CSN3: COP9 signalosome complex subunit 3</b>                   | <b>AAH44034</b>   |
| rpl38:ribosomal protein L38                                       | Q66KV2            |
| rps6: 40S ribosomal protein S6                                    | Q7ZYU0            |
| Arfgap3:ADP-ribosylation factor GTPase activating protein 3       | Q7ZYR5            |
| gpn1: GPN-loop GTPase 1                                           | Q3KQ86            |
| Eif3sg-a: Eukaryotic translation initiation factor 3 subunit G-A  | Q6DJ18            |
| Rpl34                                                             | Q4FZQ3            |
| eif3e-a:Eukaryotic translation initiation factor 3 subunit E-A    | Q918W7            |
| Rae1/Gle2:                                                        | Q7ZZY7            |
| rps28p9:ribosomal protein S28 pseudogene 9                        | Q66KP7            |
| lztfl1:leucine zipper transcription factor-like 1                 | Q7ZXF9            |
| g3bp2: GTPase activating protein                                  | Q6DFK7            |
| <b>CSN6:COP9 signalosome complex subunit 6</b>                    | <b>AAH68673</b>   |
| SNRPD3: small nuclear ribonucleoprotein D3 polypeptide 18kDa      | Q5ZL58            |
| <b>Cops2:COP9 constitutive photomorphogenic homolog subunit 2</b> | <b>Q2VPH6</b>     |
| Rpl32: ribosomal protein L32                                      | Q66KW5            |
| <b>CSN5:COP9 signalosome complex subunit 5</b>                    | <b>AAH74434</b>   |
| MGC64430                                                          | Q7SZ87            |
| rpl18a: ribosomal protein L18a                                    | Q7SZB7            |
| CDC2A:Cyclin-dependent kinase 1-A                                 | A44349            |
| Strap: serine/threonine kinase receptor associated protein        | Q642N8            |
| Rpl28: ribosomal protein L28                                      | Q66KV6            |
| Rps4:40S ribosomal protein S4                                     | Q3B893            |
| LOC443624                                                         | Q6GPN5            |
| Rpl29:ribosomal protein L29                                       | Q66KW1            |
| rps15:Ribosomal protein S15 isoform                               | Q8UW22            |
| SNRPF:Small nuclear ribonucleoprotein F                           | S55053            |
| Keratin 5                                                         | Q5XHE8            |
| Rpl36: 60S ribosomal protein L36                                  | Q66KU4            |
| <b>dynl1:dynein, light chain, LC8-type 1</b>                      | <b>Q6GPR8</b>     |
| Rpl9:ribosomal protein L9                                         | Q7ZWY6            |
| Rpl15                                                             | Q7ZWZ7            |
| homer2                                                            | Q7ZWP9            |
| nmp200                                                            | Q7ZXW4            |
| Cirbp: Cold-inducible RNA-binding protein A                       | Q7ZYU7            |
| polr2b: polymerase (RNA) II (DNA directed) polypeptide B, 140kDa  | Q6PA46            |
| rpl36a: ribosomal protein L36a                                    | Q66KU5            |
| Wtap                                                              | Q4KLT6            |
| Ppia:peptidylprolyl isomerase A (cyclophilin A)                   | Q8AVP8            |
| Rpl8: Ribosomal protein 8                                         | RL8               |
| MGC85168                                                          | Q5EAV1            |
| fgfr1op: FGFR1 oncogene partner                                   | Q3KPN4            |
| Cs: citrate synthase, mitochondrial                               | Q7ZWZ5            |
| Rpl10:ribosomal protein L10                                       | Q7ZXX4            |
| Syc1: SCY1-like protein 1                                         | Q6DKA9            |
| <b>Katnb1:Katanin p80 WD40-containing subunit B1</b>              | <b>Q4V7Y7</b>     |
| Rpl3: ribosomal protein L3                                        | Q7ZYR1            |
| rps9:ribosomal protein S9                                         | Q6GNX6            |
| Snrpd1: small nuclear ribonucleoprotein D1 polypeptide 16kDa      | Q6GR62            |
| MGC115579                                                         | Q4QQY0            |
| rpl35: ribosomal protein L35                                      | Q4FZQ7            |
| Snrpe: small nuclear ribonucleoprotein polypeptide E              | Q6GPZ6            |
| rab11b.2: RAB11B, member RAS oncogene family, gene 2              | Q5M991            |
| <b>KBTBD2:kelch repeat and BTB (POZ) domain containing 2</b>      | <b>Q61R89</b>     |
| syt12: synaptotagmin-like 2                                       | Q640J7            |
| polr21                                                            | Q6FHX3            |
| LOC443683                                                         | Q6GN49            |
| Rpl35a:60S ribosomal protein L35a                                 | R5XL32            |
| TPM3                                                              | Q5U4J6            |
